# Supplementary material
Source: publisher figshare collection journal article supplement (https://gsapubs.figshare.com/articles/dataset/_/25881655)
Supplement: Supplementary file 1 [file 1]

## Sheet: Displacement
Table S7: Results obtained from the 3D simulated model.
Deformation	Fig no.	Descriptions	Load Multiplier	Force (+X)	Force (-X)	Maximum Total Displacement	Average Total Displacement	Maximum Displacement in X	Minimum Displacement in X	Average Displacement in X	Maximum Displacement in Y	Minimum Displacement in Y	Average Displacement in Y	Maximum Displacement in Z	Minimum Displacement in Z	Average Displacement in Z
Mode/ Model No.	Gif			N	N	m	m	m	m	m	m	m	m	m	m	m
1	S14	Consecutive sagging and hogging of the lava tube roof	12.512	1751680000000000	1751600000000000	1.0303	0.4015	0.2481	-0.28496	-0.012128	1	-0.0098058	0.38517	0.054182	-0.054182	4.7146e-10
2	S15	Consecutive sagging and hogging of the lava tube roof	15.756	2205840000000000	2205900000000000	1.0007	0.23589	0.25381	-0.26484	-0.0269	1	-0.47808	-0.18238	0.09046	-0.09046	3.9507e-09
3	S16	Alternate sagging and hogging of the lava tube roof in elliptical shape	16.425	2299500000000000	2299500000000000	1.0016	0.054314	0.24462	-0.24462	-1.1795e-09	1	-1	-4.8331e-09	0.090523	-0.10108	-0.026766
4	S17	Alternate sagging and hogging of the lava tube roof in elliptical shape	19.5	2.73e+15	2730100000000000	1.0005	0.027376	0.16624	-0.20099	-0.001462	1	-0.78847	0.012471	0.13494	-0.13494	4.9405e-09
5	S18	Partially sagging and hogging of the lava tube roof in elliptical shape	19.513	2731820000000000	2731800000000000	1.0248	0.11418	0.4644	-0.4644	-1.2442e-09	1	-1	7.4669e-09	0.11524	-0.21599	-0.013276
6	S19	Partially sagging and hogging of the lava tube roof	19.899	2785860000000000	2785800000000000	1.0997	0.35448	0.34564	-0.54185	-0.0080403	1	-0.4879	0.31256	0.15419	-0.15419	-4.6385e-10
7	S20	Partially sagging and hogging of the lava tube roof in elliptical shape	23.71	3.3194e+15	3319500000000000	1.0191	0.050344	0.53128	-0.40194	0.0012504	1	-0.95569	-0.017313	0.17915	-0.17915	1.1549e-09
8	S21	Multiple alternate sagging and hogging of the lava tube roof in elliptical shape	24.193	3.38702e+15	3.387e+15	1.0036	0.020003	0.19274	-0.19274	-8.0614e-11	1	-1	6.5413e-10	0.17737	-0.13803	-0.0052321
9	S22	Multiple partially sagging and hogging of the lava tube roof in elliptical shape	28.498	3989720000000000	3989700000000000	1.0181	0.053251	0.46291	-0.46291	-2.6555e-10	1	-1	7.5888e-11	0.1681	-0.24964	-0.0085572
10	S23	Multiple alternate sagging and hogging of the lava tube roof in elliptical shape	30.776	4308640000000000	4308600000000000	1.0144	0.012346	0.1807	-0.18408	-0.00067567	1	-0.67992	0.00059942	0.2196	-0.2196	-3.7003e-11
11	S24	Multiple partially sagging and hogging of the lava tube roof in elliptical shape	34.643	4850020000000000	4850000000000000	1.0304	0.028989	0.46299	-0.36999	0.0010294	1	-0.93001	0.00066948	0.25853	-0.25853	1.9005e-09
12	S25	Pair of sagging and hogging of the lava tube roof	37.954	5313560000000000	5313600000000000	1.0051	0.085139	0.23935	-0.30054	-0.027051	1	-0.10187	-0.0062357	0.14057	-0.14057	-2.4065e-08
13	S26	Hogging within the sagging of the lava tube and vice-versa	38.248	5354720000000000	5354700000000000	1.0264	0.085295	0.25143	-0.25143	-3.4924e-09	1	-1	1.2206e-09	0.24243	-0.18733	0.059657
14	S27	Complex hogging within the sagging of the lava tube and vice-versa	39.302	5502280000000000	5502300000000000	1.0523	0.14104	0.48315	-0.48315	3.3422e-09	1	-1	1.6221e-08	0.37468	-0.33486	0.10181
15	S28	Multiple sagging and hogging of the lava tube roof	39.568	5539520000000000	5539500000000000	1.1062	0.21846	0.69448	-0.39621	0.015598	1	-0.53478	0.07823	0.23655	-0.23655	-6.1909e-08
16	S29	Sagging of one side more pronouncedly than the other and hogging in the middle	40.547	5676579999999999	5676600000000000	1.0781	0.16459	0.34056	-0.34056	-5.136e-10	1	-1	-5.5168e-09	0.13818	-0.38922	-0.038855
17	S30	Complex sagging of one side more pronouncedly than the other and hogging in the middle	42.13	5898200000000000	5898100000000000	1.0044	0.12649	0.44385	-0.44385	-2.4979e-09	1	-1	3.896e-09	0.16181	-0.36263	-0.029731
18	S31	Multiple pair of hogging and sagging alternatingly	42.183	5905620000000000	5905600000000000	1.004	0.030646	0.23846	-0.25742	-0.0033406	1	-0.76126	0.0020372	0.16969	-0.16969	1.7659e-08
19	S32	Multiple pair of hogging and sagging alternatingly	46.341	6487739999999999	6487800000000000	1.0233	0.11138	0.30501	-0.30501	-4.5795e-10	1	-1	-3.7962e-09	0.15861	-0.29337	-0.083827
20	S33	Multiple pairs of partially sagging and hogging of the lava tube roof in elliptical shape	46.6	6523999999999999	6523999999999999	1.0311	0.061971	0.44612	-0.33291	0.0020032	1	-0.8276	0.025798	0.25288	-0.25288	-1.7038e-08
		accompanied by additional smaller deformations concentrated at the center.
